# Supplementary material
Source: PubMed Central journal article supplement (PMC3387425)
Supplement: supp_jc.2011-2864_11-2864.pdf [file supp_jc.2011-2864_11-2864.pdf]

| First Author<br>(Country)                                                                                                                                                           | Year | Number<br>of<br>patients | Median<br>follow-up<br>(years) | Histology   | Parameter<br>studied |     |     | Gender<br>difference<br>favoring<br>females?                                                | Comments                                                                      |
|-------------------------------------------------------------------------------------------------------------------------------------------------------------------------------------|------|--------------------------|--------------------------------|-------------|----------------------|-----|-----|---------------------------------------------------------------------------------------------|-------------------------------------------------------------------------------|
|                                                                                                                                                                                     |      |                          |                                |             | OS                   | DSS | Rec |                                                                                             |                                                                               |
| Akslen<br>(Norway)                                                                                                                                                                  | 1991 | 2479                     | 4                              | All         | x                    | x   |     | OS (U), OS in<br>PTC only (M),<br>DSS (U)<br><i>DSS not<br/>affected by<br/>gender in M</i> | Decreased survival<br>after 55 yrs                                            |
| Akslen<br>(Norway)                                                                                                                                                                  | 1992 | 173                      | 7                              | PTC         |                      | x   | x   | DSS (U, M),<br><i>Rec not<br/>affected by<br/>gender</i>                                    |                                                                               |
| Cunningham<br>(US)                                                                                                                                                                  | 1990 | 2,282                    | 10                             | PTC,<br>PTC | x                    | x   |     | OS (U,M)<br>DSS (U, M)                                                                      | 50 yrs was the best<br>cut-off to divide<br>patients according<br>to survival |
| Mazzaferri<br>(US)                                                                                                                                                                  | 1994 | 1,355                    | 15.7                           | PTC,<br>FTC |                      | x   | x   | DSS (U, M)<br><i>Rec not<br/>affected by<br/>gender</i>                                     |                                                                               |
| Mazzaferri<br>(US)                                                                                                                                                                  | 2001 | 1501                     | 16.6                           | PTC,<br>FTC |                      | x   | x   | DSS (U, M)<br><i>Rec not<br/>affected by<br/>gender</i>                                     | Additional follow-<br>up of cohort<br>reported in 1994                        |
| Micheli<br>(Europe)                                                                                                                                                                 | 2009 | 22,918                   | ?                              | All         | x                    |     |     | OS (U, M)                                                                                   | OS better in<br>women under 55<br>yrs than women<br>over 55 yrs               |
| Samaan<br>(US)                                                                                                                                                                      | 1992 | 1599                     | 11                             | PTC,<br>FTC |                      | x   | x   | DSS (U, M)<br>Rec (U), <i>Rec<br/>not affected by<br/>gender in M</i>                       |                                                                               |
| Tubiana<br>(France)                                                                                                                                                                 | 1985 | 546                      | At least 8                     | PTC,<br>FTC | x                    |     | x   | OS (U, M)<br>Rec (U, M)                                                                     | OS better and Rec<br>less in patients<br>under 45 yrs                         |
| <i>PTC = papillary thyroid cancer, FTC = follicular thyroid cancer, OS = overall survival, DSS = disease specific survival, Rec = recurrences, U = univariate, M = multivariate</i> |      |                          |                                |             |                      |     |     |                                                                                             |                                                                               |

Supplemental Table 1. Studies reporting gender differences in thyroid cancer outcomes

| <b>Authors</b>                                                                                                                                                                                                                              | <b>Year</b> | <b>Cut-off (years)</b> | <b>Gender-based cut-off noted</b> | <b>Number of patients</b> | <b>Outcome</b>          | <b>Reference Number</b> |
|---------------------------------------------------------------------------------------------------------------------------------------------------------------------------------------------------------------------------------------------|-------------|------------------------|-----------------------------------|---------------------------|-------------------------|-------------------------|
| Tubiana                                                                                                                                                                                                                                     | 1985        | 45                     |                                   | 546                       | Recurrence and survival | 4                       |
| Simpson                                                                                                                                                                                                                                     | 1987        | 45                     |                                   | 1578                      | Recurrence and Survival | 63                      |
| Mazzaferri                                                                                                                                                                                                                                  | 1994*       | 45                     |                                   | 1355                      | Survival                | 8                       |
| Byar                                                                                                                                                                                                                                        | 1979        | 60                     |                                   | 591                       | Survival                | 58                      |
| Cady                                                                                                                                                                                                                                        | 1979        | 50 F<br>40 M           | Yes                               | 613                       | Recurrence and Survival | 28                      |
| Carcangiu                                                                                                                                                                                                                                   | 1985        | 60 F<br>40 M           | Yes                               | 241                       | Survival                | 5                       |
| Cunningham                                                                                                                                                                                                                                  | 1990*       | 50                     |                                   | 2282                      | Survival                | 2                       |
| Akslen                                                                                                                                                                                                                                      | 1991*       | 55                     |                                   | 2479                      | Survival                | 1                       |
| Shah                                                                                                                                                                                                                                        | 1992*       | 50                     |                                   | 931                       | Survival                | 11                      |
| Mazzaferri                                                                                                                                                                                                                                  | 1994*       | 60                     |                                   | 1355                      | Recurrence              | 8                       |
| <p><i>M=males, F=females,</i><br/> <i>*analyses performed after the introduction of the TNM staging system in 1987</i><br/> <i>gray shading indicates analyses showing a 45 year cut-off</i><br/> <i>TNM = tumor, nodes, metastases</i></p> |             |                        |                                   |                           |                         |                         |

Supplemental Table 2. Studies showing an age “cut-off” as a prognostic factor in thyroid cancer survival and recurrence
